# Supplementary material for: Pre- and post-synthetic modulation of the ordering temperatures in a family of anilato-based magnets
Source: Royal Society of Chemistry journal article supplement (doi:10.1039/c9dt02275a), 2019-01-01
Supplement: c9dt02275a1.pdf [file c9dt02275a1.pdf]

## **Pre- and post-synthetic modulation of the ordering temperatures in a family of anilato-based magnets**

Cristian Martínez Hernández, Patricia Gómez-Claramunt, Samia Benmansour\* and Carlos J. Gómez-García\*

*Departamento de Química Inorgánica. Instituto de Ciencia Molecular (ICMol). Universidad de Valencia. C/ Catedrático José Beltrán, 2. 46980 Paterna (Valencia), Spain*

**Supporting information**

## X-ray powder diffraction

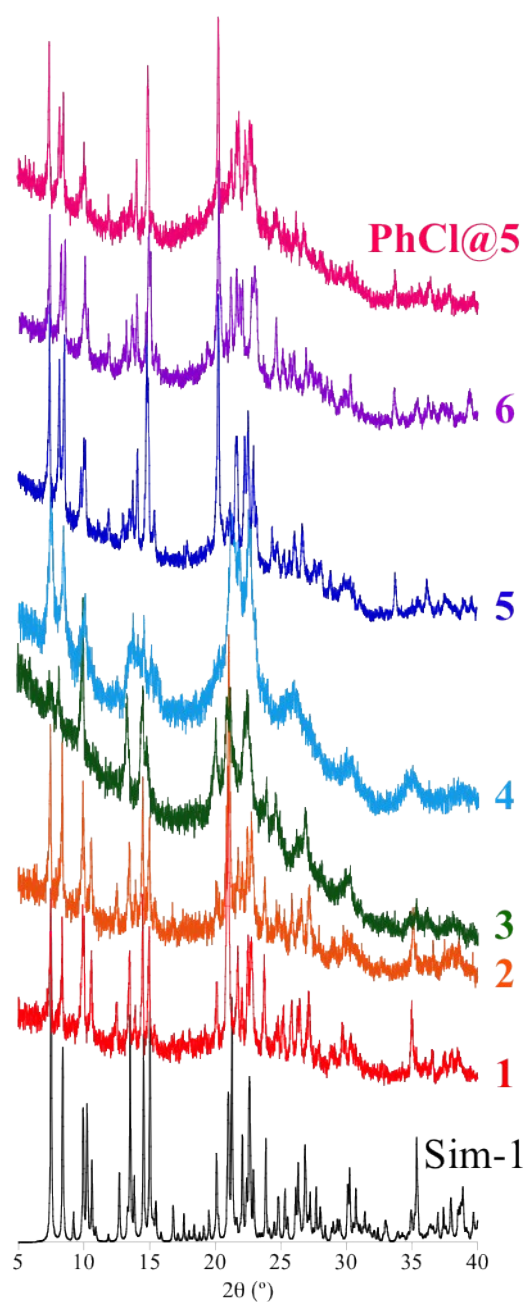

**Figure S1.** Experimental X-ray powder diffractograms of compounds  $(\text{NBu}_4)[\text{MnCr}(\text{C}_6\text{O}_4\text{Br}_2)_3] \cdot 1.75\text{C}_6\text{H}_5\text{Br}$  (**1**),  $(\text{NBu}_4)[\text{MnCr}(\text{C}_6\text{O}_4\text{Br}_2)_3] \cdot \text{C}_6\text{H}_5\text{Cl}$  (**2**),  $(\text{NBu}_4)[\text{MnCr}(\text{C}_6\text{O}_4\text{Br}_2)_3] \cdot \text{C}_6\text{H}_5\text{I}$  (**3**),  $(\text{NBu}_4)[\text{MnCr}(\text{C}_6\text{O}_4\text{Br}_2)_3] \cdot \text{C}_6\text{H}_5\text{CH}_3$  (**4**),  $(\text{NBu}_4)[\text{MnCr}(\text{C}_6\text{O}_4\text{Br}_2)_3] \cdot 2\text{C}_6\text{H}_5\text{CN}$  (**5**),  $(\text{NBu}_4)[\text{MnCr}(\text{C}_6\text{O}_4\text{Br}_2)_3] \cdot 2\text{C}_6\text{H}_5\text{NO}_2$  (**6**),  $(\text{NBu}_4)[\text{MnCr}(\text{C}_6\text{O}_4\text{Br}_2)_3] \cdot 2\text{C}_6\text{H}_5\text{CN}$  exchanged with  $\text{C}_6\text{H}_5\text{Cl}$  (**PhCl@5**) and the simulated one from the single crystal X-ray structure of compound **1**.

**Table S1.** Unit cell parameters of compounds (NBu<sub>4</sub>)[MnCr(C<sub>6</sub>O<sub>4</sub>Br<sub>2</sub>)<sub>3</sub>]·1.75C<sub>6</sub>H<sub>5</sub>Br (**1**), (NBu<sub>4</sub>)[MnCr(C<sub>6</sub>O<sub>4</sub>Br<sub>2</sub>)<sub>3</sub>]·C<sub>6</sub>H<sub>5</sub>Cl (**2**), (NBu<sub>4</sub>)[MnCr(C<sub>6</sub>O<sub>4</sub>Br<sub>2</sub>)<sub>3</sub>]·C<sub>6</sub>H<sub>5</sub>I (**3**), (NBu<sub>4</sub>)[MnCr(C<sub>6</sub>O<sub>4</sub>Br<sub>2</sub>)<sub>3</sub>]·C<sub>6</sub>H<sub>5</sub>CH<sub>3</sub> (**4**), (NBu<sub>4</sub>)[MnCr(C<sub>6</sub>O<sub>4</sub>Br<sub>2</sub>)<sub>3</sub>]·2C<sub>6</sub>H<sub>5</sub>CN (**5**), (NBu<sub>4</sub>)[MnCr(C<sub>6</sub>O<sub>4</sub>Br<sub>2</sub>)<sub>3</sub>]·2C<sub>6</sub>H<sub>5</sub>NO<sub>2</sub> (**6**) and (NBu<sub>4</sub>)[MnCr(C<sub>6</sub>O<sub>4</sub>Br<sub>2</sub>)<sub>3</sub>]·2C<sub>6</sub>H<sub>5</sub>CN exchanged with C<sub>6</sub>H<sub>5</sub>Cl (**PhCl@5**) determined from their X-ray powder diffractograms at room temperature.

| compound                                                                                                                                               | a (Å)     | b (Å)       | c (Å)      | β (°)      | Volume (Å <sup>3</sup> ) |
|--------------------------------------------------------------------------------------------------------------------------------------------------------|-----------|-------------|------------|------------|--------------------------|
| (NBu <sub>4</sub> )[MnCr(C <sub>6</sub> O <sub>4</sub> Br <sub>2</sub> ) <sub>3</sub> ]·1.75C <sub>6</sub> H <sub>5</sub> Br ( <b>1</b> ) <sup>a</sup> | 9.9557(5) | 23.6054(10) | 12.2129(6) | 105.187(5) | 2769.9(2)                |
| (NBu <sub>4</sub> )[MnCr(C <sub>6</sub> O <sub>4</sub> Br <sub>2</sub> ) <sub>3</sub> ]·1.75C <sub>6</sub> H <sub>5</sub> Br ( <b>1</b> ) <sup>b</sup> | 10.104(4) | 23.70(1)    | 12.363(5)  | 106.78(4)  | 2834.17                  |
| (NBu <sub>4</sub> )[MnCr(C <sub>6</sub> O <sub>4</sub> Br <sub>2</sub> ) <sub>3</sub> ]·C <sub>6</sub> H <sub>5</sub> Cl ( <b>2</b> )                  | 10.049(4) | 23.69(1)    | 12.330(6)  | 106.85(4)  | 2809.36                  |
| (NBu <sub>4</sub> )[MnCr(C <sub>6</sub> O <sub>4</sub> Br <sub>2</sub> ) <sub>3</sub> ]·C <sub>6</sub> H <sub>5</sub> I ( <b>3</b> )                   | 9.92(2)   | 23.59(9)    | 12.50(5)   | 106.2(3)   | 2807.14                  |
| (NBu <sub>4</sub> )[MnCr(C <sub>6</sub> O <sub>4</sub> Br <sub>2</sub> ) <sub>3</sub> ]·C <sub>6</sub> H <sub>5</sub> CH <sub>3</sub> ( <b>4</b> )     | 9.98(2)   | 23.64(7)    | 12.19(3)   | 105.9(3)   | 2768.64                  |
| (NBu <sub>4</sub> )[MnCr(C <sub>6</sub> O <sub>4</sub> Br <sub>2</sub> ) <sub>3</sub> ]·2C <sub>6</sub> H <sub>5</sub> CN ( <b>5</b> )                 | 9.88(2)   | 23.36(9)    | 12.25(4)   | 105.7(3)   | 2720.91                  |
| (NBu <sub>4</sub> )[MnCr(C <sub>6</sub> O <sub>4</sub> Br <sub>2</sub> ) <sub>3</sub> ]·2C <sub>6</sub> H <sub>5</sub> NO <sub>2</sub> ( <b>6</b> )    | 9.81(3)   | 23.4(1)     | 12.15(6)   | 106.3(5)   | 2834.17                  |
| (NBu <sub>4</sub> )[MnCr(C <sub>6</sub> O <sub>4</sub> Br <sub>2</sub> ) <sub>3</sub> ]·C <sub>6</sub> H <sub>5</sub> Cl ( <b>PhCl@5</b> )             | 9.91(1)   | 23.38(5)    | 12.21(2)   | 105.6(2)   | 2727.00                  |

<sup>a</sup> Single crystal X-ray data at 120 K.

<sup>b</sup> Determined from X-ray powder data at room temperature

### IR spectroscopy

**Table S2.** Selected vibrational frequencies (cm<sup>-1</sup>) for compounds (NBu<sub>4</sub>)[MnCr(C<sub>6</sub>O<sub>4</sub>Br<sub>2</sub>)<sub>3</sub>]·1.75C<sub>6</sub>H<sub>5</sub>Br (**1**), (NBu<sub>4</sub>)[MnCr(C<sub>6</sub>O<sub>4</sub>Br<sub>2</sub>)<sub>3</sub>]·C<sub>6</sub>H<sub>5</sub>Cl (**2**), (NBu<sub>4</sub>)[MnCr(C<sub>6</sub>O<sub>4</sub>Br<sub>2</sub>)<sub>3</sub>]·C<sub>6</sub>H<sub>5</sub>I (**3**), (NBu<sub>4</sub>)[MnCr(C<sub>6</sub>O<sub>4</sub>Br<sub>2</sub>)<sub>3</sub>]·C<sub>6</sub>H<sub>5</sub>CH<sub>3</sub> (**4**), (NBu<sub>4</sub>)[MnCr(C<sub>6</sub>O<sub>4</sub>Br<sub>2</sub>)<sub>3</sub>]·2C<sub>6</sub>H<sub>5</sub>CN (**5**), (NBu<sub>4</sub>)[MnCr(C<sub>6</sub>O<sub>4</sub>Br<sub>2</sub>)<sub>3</sub>]·2C<sub>6</sub>H<sub>5</sub>NO<sub>2</sub> (**6**), (NBu<sub>4</sub>)[MnCr(C<sub>6</sub>O<sub>4</sub>Br<sub>2</sub>)<sub>3</sub>]·2C<sub>6</sub>H<sub>5</sub>CN exchanged with C<sub>6</sub>H<sub>5</sub>Cl (**PhCl@5**) and (NBu<sub>4</sub>)[MnCr(C<sub>6</sub>O<sub>4</sub>Br<sub>2</sub>)<sub>3</sub>] (**7**).

| Band                              | PhBr<br>( <b>1</b> ) | PhCl<br>( <b>2</b> ) | PhI<br>( <b>3</b> ) | PhCH <sub>3</sub><br>( <b>4</b> ) | PhCN<br>( <b>5</b> ) | PhNO <sub>2</sub><br>( <b>6</b> ) | PhCl<br>( <b>PhCl@5</b> ) | -<br>( <b>7</b> ) |
|-----------------------------------|----------------------|----------------------|---------------------|-----------------------------------|----------------------|-----------------------------------|---------------------------|-------------------|
| ν(C-H)                            | 2958                 | 2959                 | 2959                | 2961                              | 2960                 | 2963                              | 2959                      | 2960              |
|                                   | 2935                 | 2930                 | 2928                | 2934                              | 2933                 | 2933                              | 2928                      | 2923              |
|                                   | 2878                 | 2880                 | 2871                | 2872                              | 2874                 | 2873                              | 2872                      | 2873              |
| ν(C=O)                            | 1602                 | 1616                 | 1635                | 1626                              | 1603                 | 1616                              | 1601                      | 1603              |
| ν(C=C) + ν(C-O)                   | 1489                 | 1490                 | 1492                | 1490                              | 1490                 | 1490                              | 1486                      | 1490              |
| δ(C-H)                            | 1382                 | 1384                 | 1384                | 1383                              | 1383                 | 1384                              | 1382                      | 1385              |
| ν(C-C) + ν(C-O)                   | 1353                 | 1353                 | 1356                | 1353                              | 1355                 | 1350                              | 1353                      | 1356              |
| δ(C-Br)                           | 818                  | 817                  | 820                 | 819                               | 817                  | 819                               | 818                       | 817               |
| ρ(C-Br)                           | 562                  | 562                  | 560                 | 561                               | 562                  | 562                               | 562                       | 560               |
| ν(C=C) <sup>1</sup>               | 1508*                | 1505                 | 1508                | 1505                              | 1506                 | 1506                              | 1505                      | 1506              |
| δ(C-H) <sup>1</sup>               | 686                  | 685                  | 685                 | 686                               | 694                  | 683                               | 685                       | -                 |
|                                   | 736                  | 740                  | 731                 | 733                               | 730                  | 705                               | 740                       | -                 |
| ν(CN) <sup>1</sup>                | -                    | -                    | -                   | 2226                              | -                    | -                                 | -                         | -                 |
| ν(N-O) <sub>as</sub> <sup>1</sup> | -                    | -                    | -                   | -                                 | -                    | 1520                              | -                         | -                 |
| ν(N-O) <sub>s</sub> <sup>1</sup>  | -                    | -                    | -                   | -                                 | -                    | 1343                              | -                         | -                 |
| ν(C-N) <sup>1</sup>               | -                    | -                    | -                   | -                                 | -                    | 875                               | -                         | -                 |

1- Solvent bands; \*shoulder.

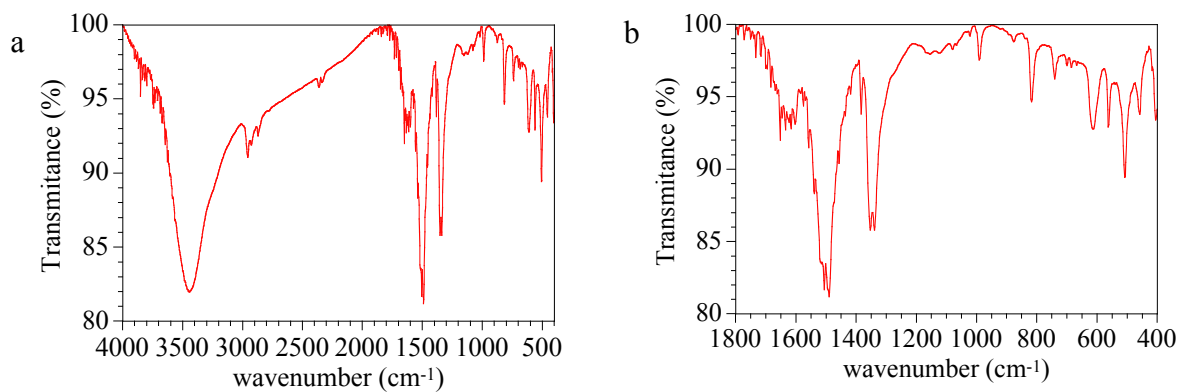

**Figure S2.** FT-IR spectra of compound 1 in (a) the 4000-400  $\text{cm}^{-1}$  region and (b) the 1800-400  $\text{cm}^{-1}$  region.

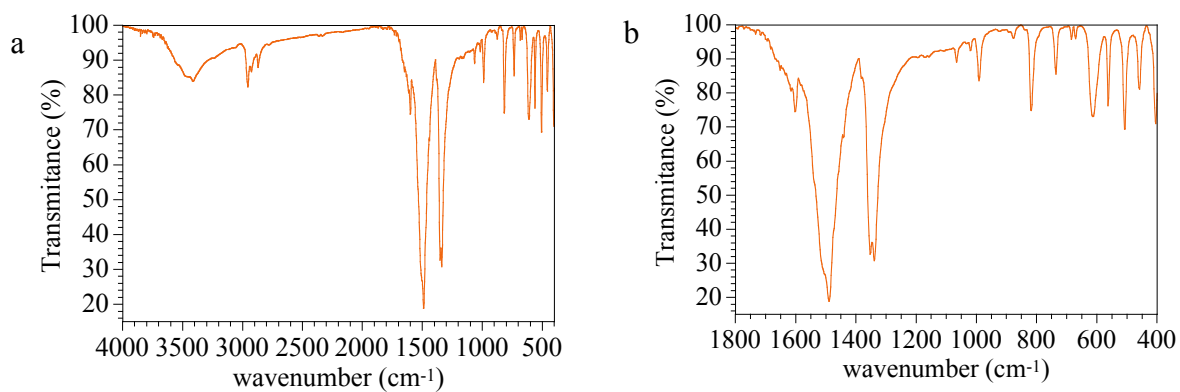

**Figure S3.** FT-IR spectra of compound 2 in (a) the 4000-400  $\text{cm}^{-1}$  region and (b) the 1800-400  $\text{cm}^{-1}$  region.

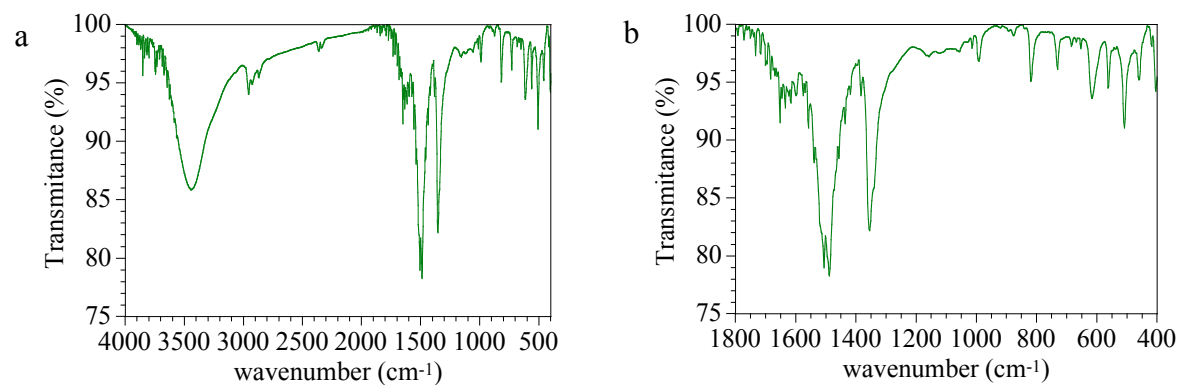

**Figure S4.** FT-IR spectra of compound 3 in (a) the 4000-400  $\text{cm}^{-1}$  region and (b) the 1800-400  $\text{cm}^{-1}$  region.

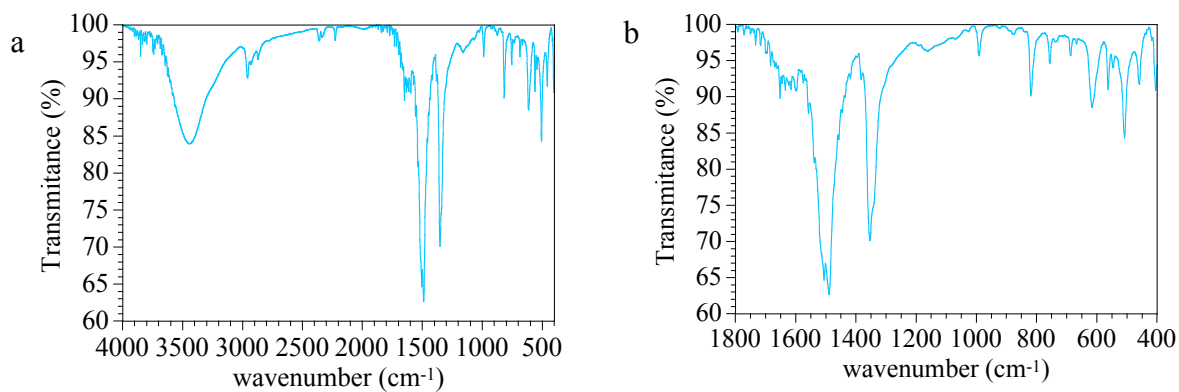

**Figure S5.** FT-IR spectra of compound 4 in (a) the 4000-400 cm<sup>-1</sup> region and (b) the 1800-400 cm<sup>-1</sup> region.

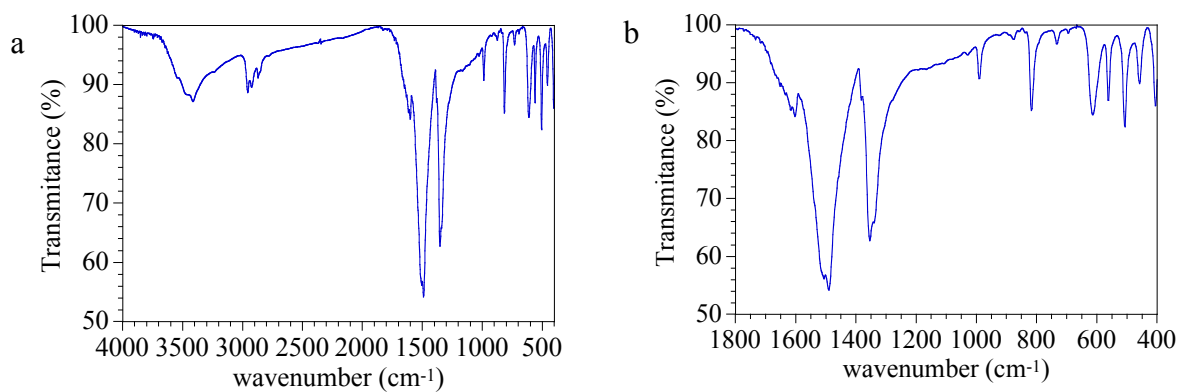

**Figure S6.** FT-IR spectra of compound 5 in (a) the 4000-400 cm<sup>-1</sup> region and (b) the 1800-400 cm<sup>-1</sup> region.

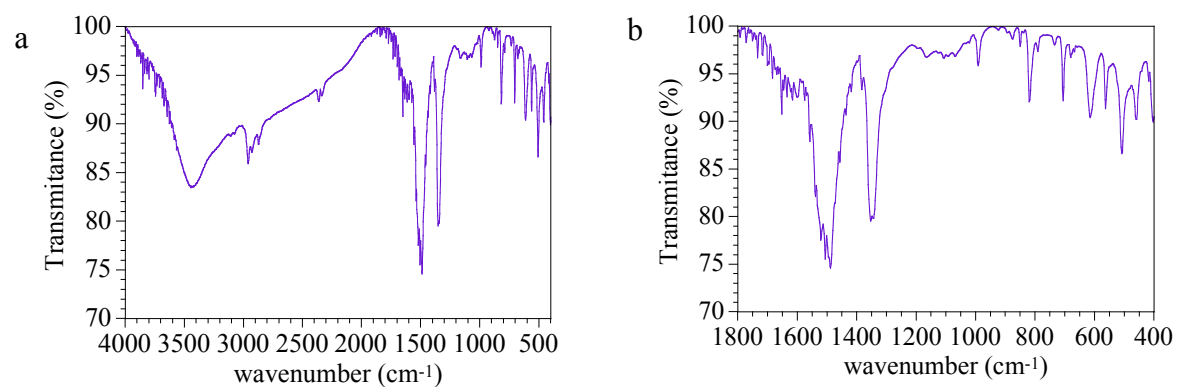

**Figure S7.** FT-IR spectra of compound 6 in (a) the 4000-400 cm<sup>-1</sup> region and (b) the 1800-400 cm<sup>-1</sup> region.

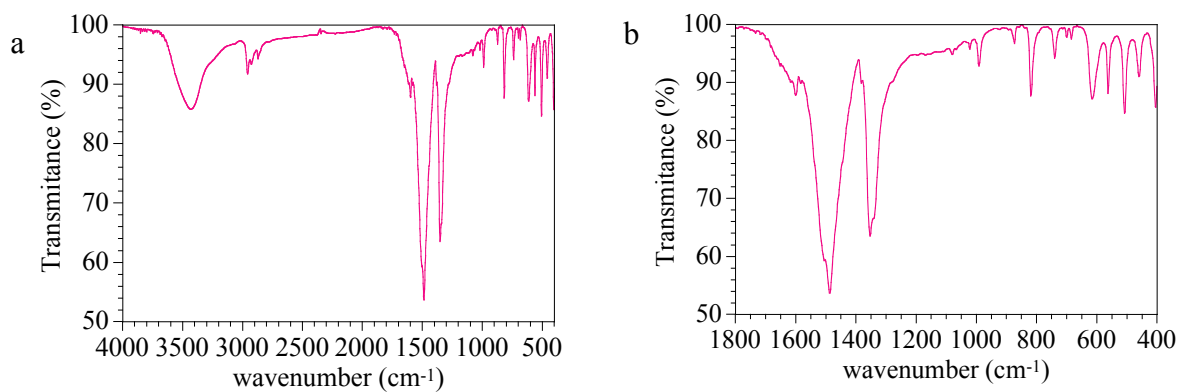

**Figure S8.** FT-IR spectra of compound **PhCl@5** in (a) the 4000-400 cm<sup>-1</sup> region and (b) the 1800-400 cm<sup>-1</sup> region.

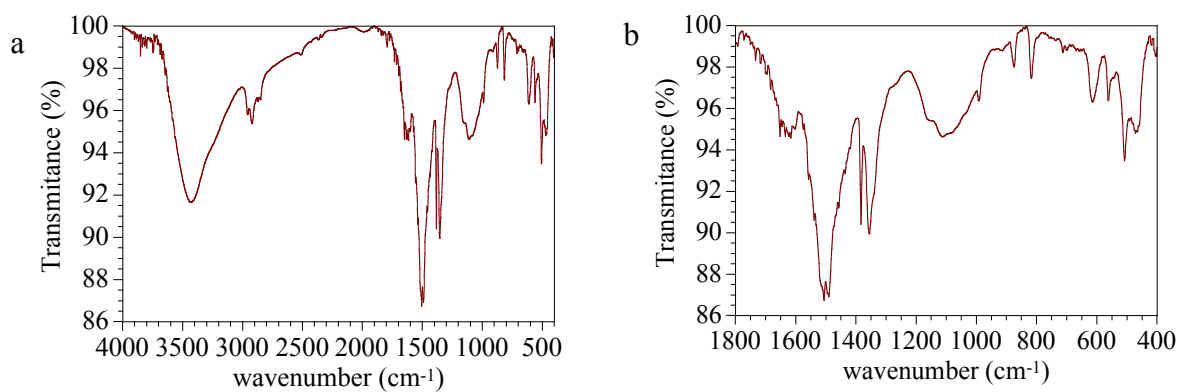

**Figure S9.** FT-IR spectra of compound **7** in (a) the 4000-400 cm<sup>-1</sup> region and (b) the 1800-400 cm<sup>-1</sup> region.

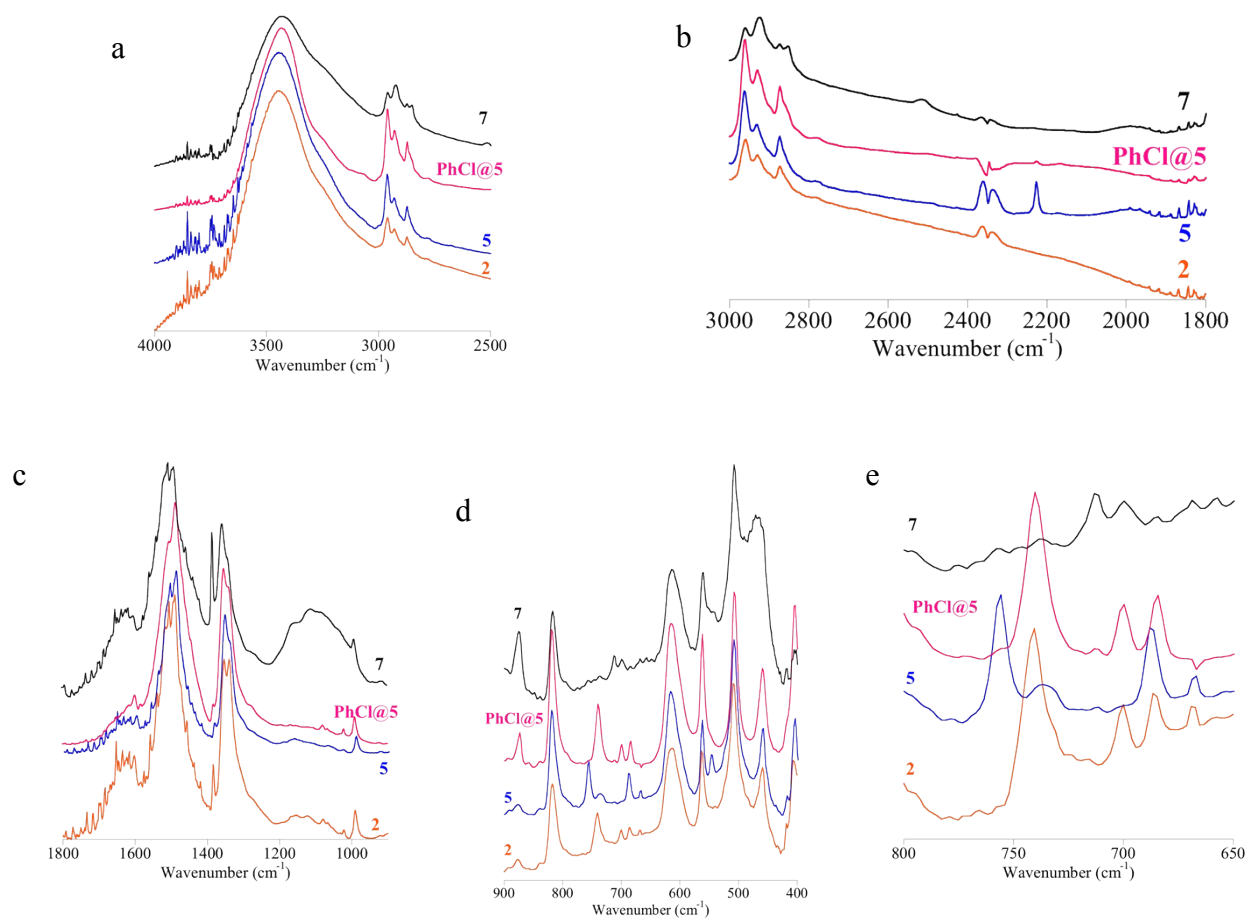

**Figure S10.** FT-IR spectra of compounds 2, 5, PhCl@5 and 7 in the (a) the 4000-2500  $\text{cm}^{-1}$ , (b) the 3000-1800  $\text{cm}^{-1}$ , (c) the 1800-900  $\text{cm}^{-1}$ , (d) the 900-400  $\text{cm}^{-1}$  and (e) the 800-400  $\text{cm}^{-1}$  regions.

### Thermogravimetric analysis

**Table S3.** Weight loss and the corresponding solvent molecules in compounds  $(\text{NBu}_4)[\text{MnCr}(\text{C}_6\text{O}_4\text{Br}_2)_3] \cdot 1.75\text{C}_6\text{H}_5\text{Br}$  (**1**),  $(\text{NBu}_4)[\text{MnCr}(\text{C}_6\text{O}_4\text{Br}_2)_3] \cdot \text{C}_6\text{H}_5\text{Cl}$  (**2**),  $(\text{NBu}_4)[\text{MnCr}(\text{C}_6\text{O}_4\text{Br}_2)_3] \cdot \text{C}_6\text{H}_5\text{I}$  (**3**),  $(\text{NBu}_4)[\text{MnCr}(\text{C}_6\text{O}_4\text{Br}_2)_3] \cdot \text{C}_6\text{H}_5\text{CH}_3$  (**4**),  $(\text{NBu}_4)[\text{MnCr}(\text{C}_6\text{O}_4\text{Br}_2)_3] \cdot 2\text{C}_6\text{H}_5\text{CN}$  (**5**) and  $(\text{NBu}_4)[\text{MnCr}(\text{C}_6\text{O}_4\text{Br}_2)_3] \cdot 2\text{C}_6\text{H}_5\text{NO}_2$  (**6**).

| Compound      | temperature range (°C) | Experimental weight loss (%) | solvent                             | Calculated weight loss (%) |
|---------------|------------------------|------------------------------|-------------------------------------|----------------------------|
| <b>1</b>      | 30-280                 | 18.1                         | $1.75\text{C}_6\text{H}_5\text{Br}$ | 18.2                       |
| <b>2</b>      | 30-190                 | 7.8                          | $\text{C}_6\text{H}_5\text{Cl}$     | 8.3                        |
| <b>3</b>      | 30-270                 | 11.4                         | $\text{C}_6\text{H}_5\text{I}$      | 14.1                       |
| <b>4</b>      | 30-190                 | 6.9                          | $\text{C}_6\text{H}_5\text{CH}_3$   | 6.9                        |
| <b>5</b>      | 30-190                 | 13.2                         | 2 $\text{C}_6\text{H}_5\text{CN}$   | 14.3                       |
| <b>6</b>      | 30-270                 | 14.5                         | 2 $\text{C}_6\text{H}_5\text{NO}_2$ | 16.6                       |
| <b>PhCl@5</b> | 30-190                 | 10.5                         | $\text{C}_6\text{H}_5\text{Cl}$     | 8.3                        |

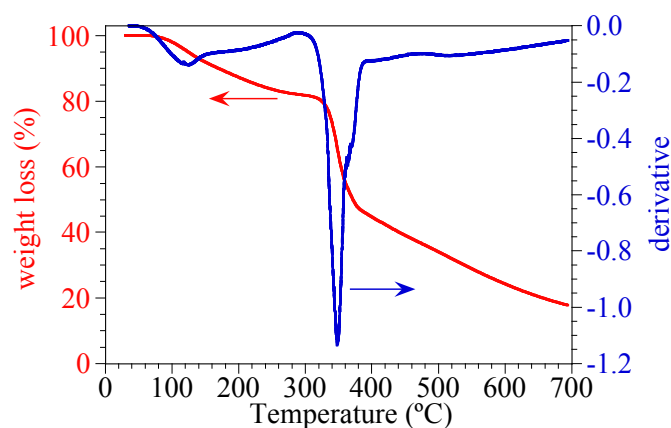

**Figure S11.** Thermogravimetric measurements of  $(\text{NBu}_4)[\text{MnCr}(\text{C}_6\text{O}_4\text{Br}_2)_3] \cdot 1.75\text{C}_6\text{H}_5\text{Br}$  (**1**).

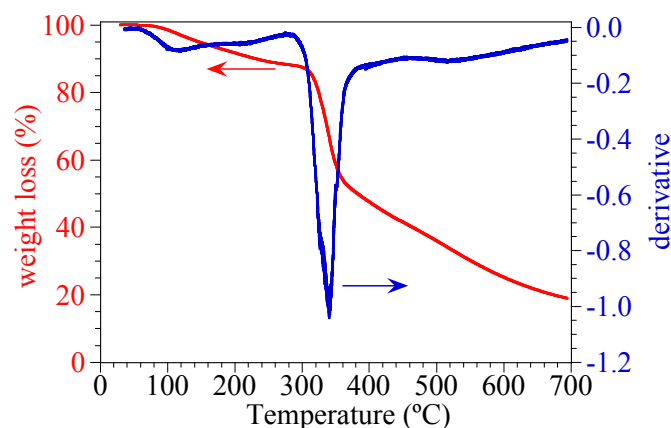

**Figure S12.** Thermogravimetric measurements of  $(\text{NBu}_4)[\text{MnCr}(\text{C}_6\text{O}_4\text{Br}_2)_3] \cdot \text{C}_6\text{H}_5\text{Cl}$  (**2**).



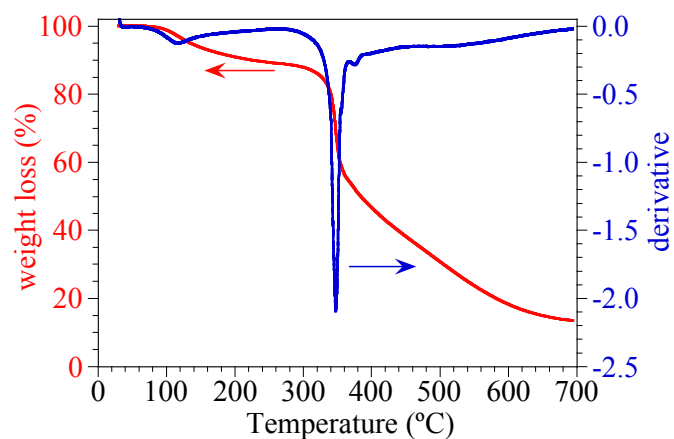

**Figure S13.** Thermogravimetric measurements of  $(\text{NBu}_4)[\text{MnCr}(\text{C}_6\text{O}_4\text{Br}_2)_3] \cdot \text{C}_6\text{H}_5\text{I}$  (**3**).

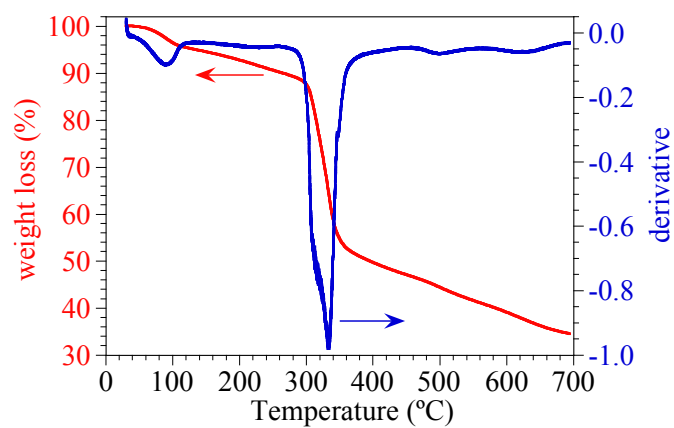

**Figure S14.** Thermogravimetric measurements of  $(\text{NBu}_4)[\text{MnCr}(\text{C}_6\text{O}_4\text{Br}_2)_3] \cdot \text{C}_6\text{H}_5\text{CH}_3$  (**4**).

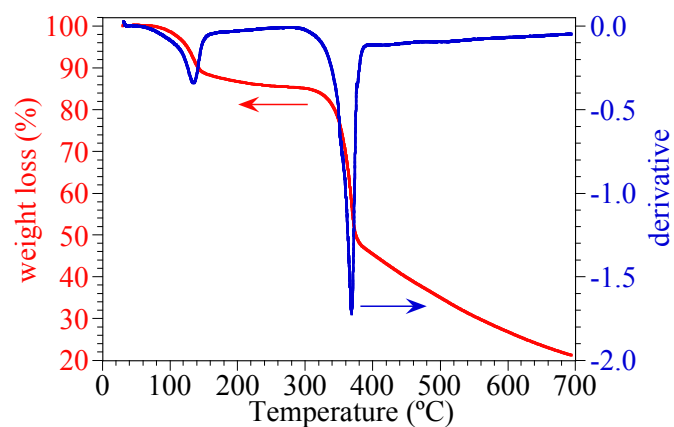

**Figure S15.** Thermogravimetric measurements of  $(\text{NBu}_4)[\text{MnCr}(\text{C}_6\text{O}_4\text{Br}_2)_3] \cdot 2\text{C}_6\text{H}_5\text{CN}$  (**5**).

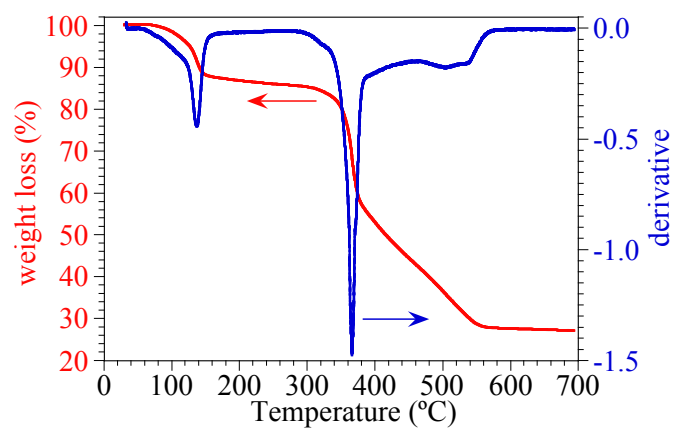

**Figure S16.** Thermogravimetric measurements of  $(\text{NBu}_4)[\text{MnCr}(\text{C}_6\text{O}_4\text{Br}_2)_3] \cdot 2\text{C}_6\text{H}_5\text{NO}_2$  (**6**).

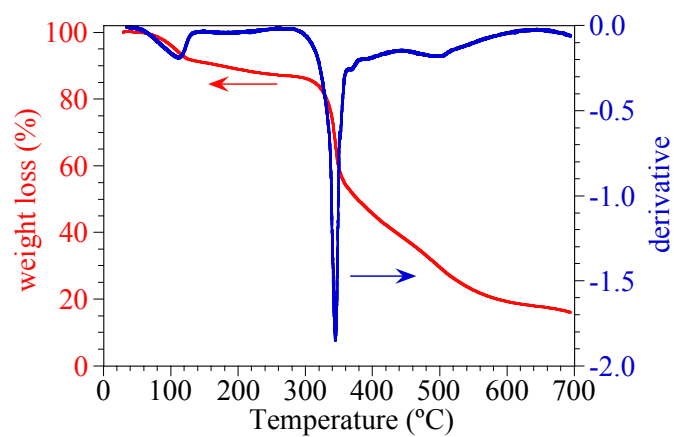

**Figure S17.** Thermogravimetric measurements of  $(\text{NBu}_4)[\text{MnCr}(\text{C}_6\text{O}_4\text{Br}_2)_3] \cdot 2\text{C}_6\text{H}_5\text{CN}$  exchanged with  $\text{C}_6\text{H}_5\text{Cl}$  (**PhCl@5**).

**Table S4.** Average Mn-O and Cr-O bond distances (Å) in all the reported bromanilato-bridged Mn(II)Cr(III) compounds.

| CCDC     | A <sup>+</sup>                                    | Mn-O (a)               | Cr-O (b)               | T <sub>c</sub> (K) | Ref.      |
|----------|---------------------------------------------------|------------------------|------------------------|--------------------|-----------|
| MIRFIE   | (H <sub>3</sub> O)(phz) <sub>3</sub> <sup>+</sup> | 2.102(15) <sup>a</sup> | 2.102(15) <sup>a</sup> | 6.0                | 1         |
| HOWHIM   | Fe(sal <sub>2</sub> -epe) <sup>+</sup>            | 2.030(18) <sup>a</sup> | 2.030(18) <sup>a</sup> | 10.2               | 2         |
| HOWHOS   | Fe(5-Cl-sal <sub>2</sub> -trien) <sup>+</sup>     | 2.16(3)                | 1.980(15)              | 9.8                | 2         |
| MUMLAJ   | [Fe(acac <sub>2</sub> -trien)] <sup>+</sup>       | 2.16(3)                | 1.980(6)               | 11.1               | 3         |
| MUMLEN   | [Ga(acac <sub>2</sub> -trien)] <sup>+</sup>       | 2.180(4)               | 1.976(5)               | 11.6               | 3         |
| SEPLAD   | Me <sub>2</sub> NH <sub>2</sub> <sup>+</sup>      | 2.208(12)              | 1.972(9)               | 7.9                | 4         |
| SEPLEH   | Et <sub>2</sub> NH <sub>2</sub> <sup>+</sup>      | 2.171(16)              | 1.962(13)              | 8.9                | 4         |
| SEPROX   | Et(i-Pr) <sub>2</sub> NH <sup>+</sup>             | 2.17(2)                | 1.985(18)              | 9.0                | 4         |
| <b>1</b> | NBu <sub>4</sub> <sup>+</sup>                     | 2.14(3)                | 1.98(2)                | 9.5                | this work |

<sup>a</sup>Mn and Cr atoms are crystallographically equivalent.

## Magnetic Properties

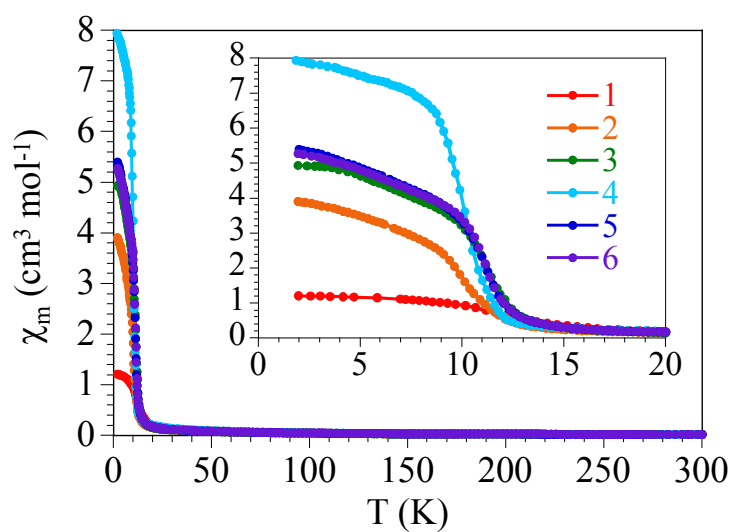

**Figure S18.** Thermal variation of  $\chi_m$  for compounds **1-6**. Inset shows the low temperature region.

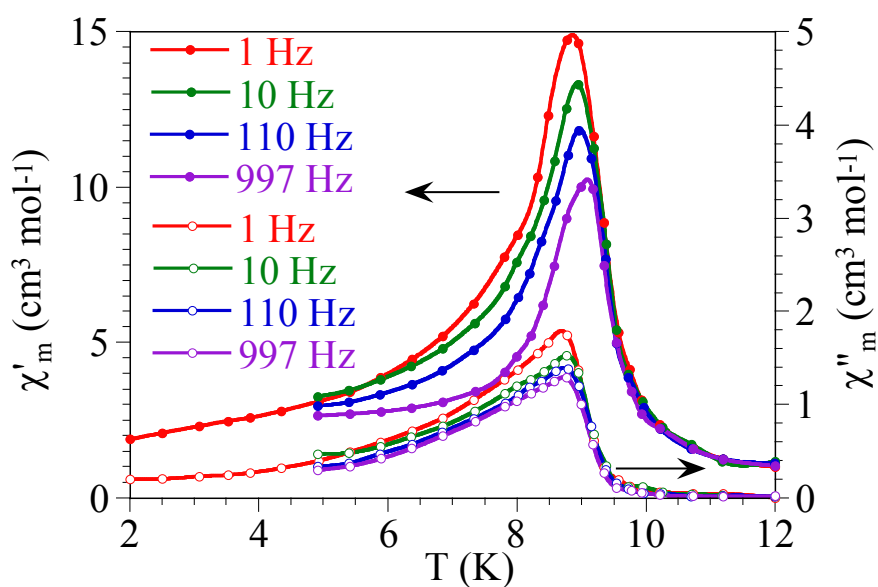

**Figure S19.** Thermal variation of the in phase ( $\chi'$ , filled circles, left scale) and out of phase ( $\chi''$ , empty circles, right scale) AC susceptibility at different frequencies for compound  $(\text{NBu}_4)[\text{MnCr}(\text{C}_6\text{O}_4\text{Br}_2)_3] \cdot 1.75\text{C}_6\text{H}_5\text{Br}$  (**1**)

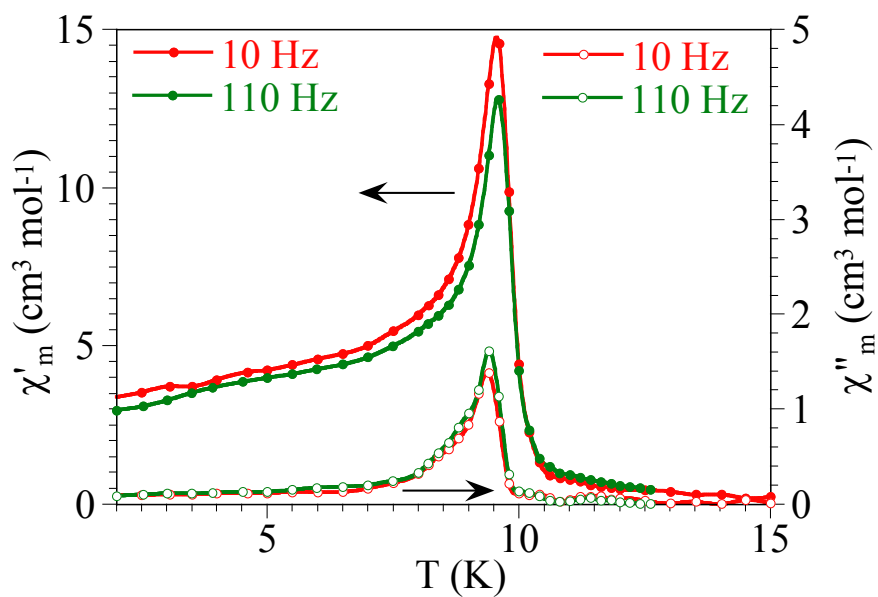

**Figure S20.** Thermal variation of the in phase ( $\chi'$ , filled circles, left scale) and out of phase ( $\chi''$ , empty circles, right scale) AC susceptibility at different frequencies for compound  $(\text{NBu}_4)[\text{MnCr}(\text{C}_6\text{O}_4\text{Br}_2)_3] \cdot \text{C}_6\text{H}_5\text{Cl}$  (**2**)

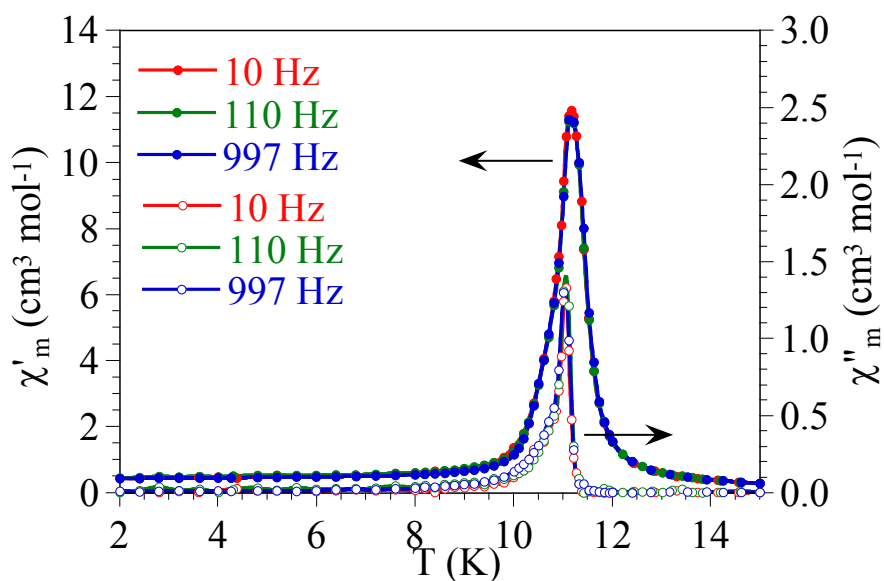

**Figure S21.** Thermal variation of the in phase ( $\chi'$ , filled circles, left scale) and out of phase ( $\chi''$ , empty circles, right scale) AC susceptibility at different frequencies for compound  $(\text{NBu}_4)[\text{MnCr}(\text{C}_6\text{O}_4\text{Br}_2)_3] \cdot \text{C}_6\text{H}_5\text{I}$  (**3**)

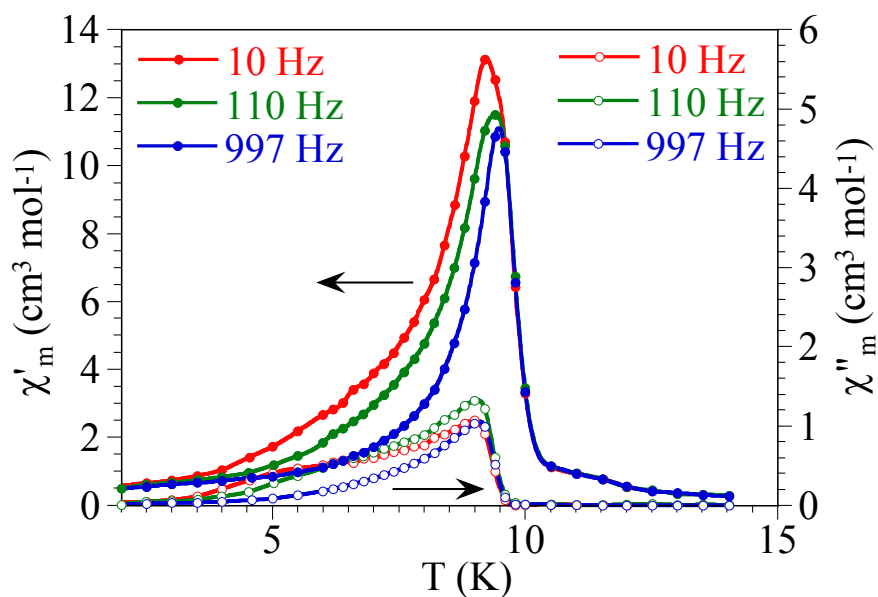

**Figure S22.** Thermal variation of the in phase ( $\chi'$ , filled circles, left scale) and out of phase ( $\chi''$ , empty circles, right scale) AC susceptibility at different frequencies for compound  $(\text{NBu}_4)[\text{MnCr}(\text{C}_6\text{O}_4\text{Br}_2)_3] \cdot \text{C}_6\text{H}_5\text{CH}_3$  (**4**)

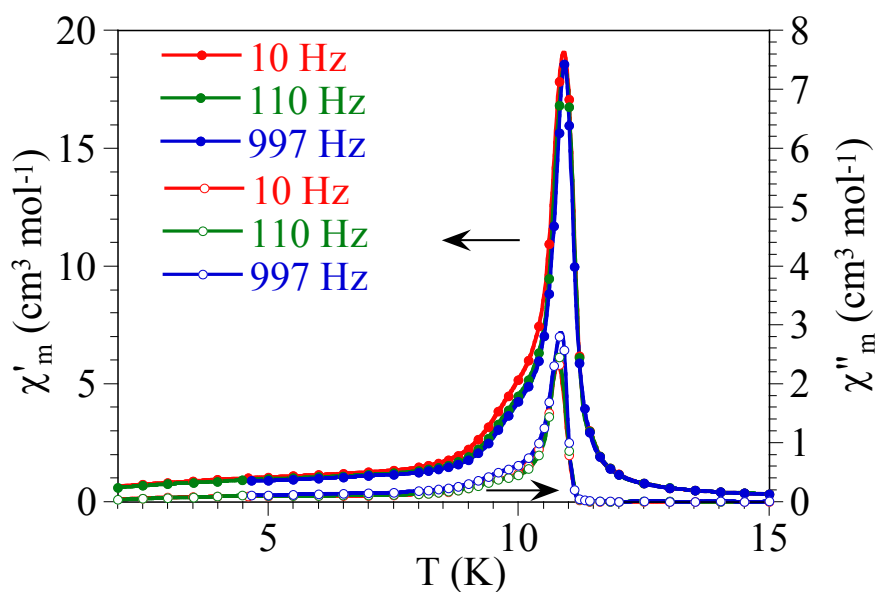

**Figure S23.** Thermal variation of the in phase ( $\chi'$ , filled circles, left scale) and out of phase ( $\chi''$ , empty circles, right scale) AC susceptibility at different frequencies for compound  $(\text{NBu}_4)[\text{MnCr}(\text{C}_6\text{O}_4\text{Br}_2)_3] \cdot 2\text{C}_6\text{H}_5\text{CN}$  (**5**)

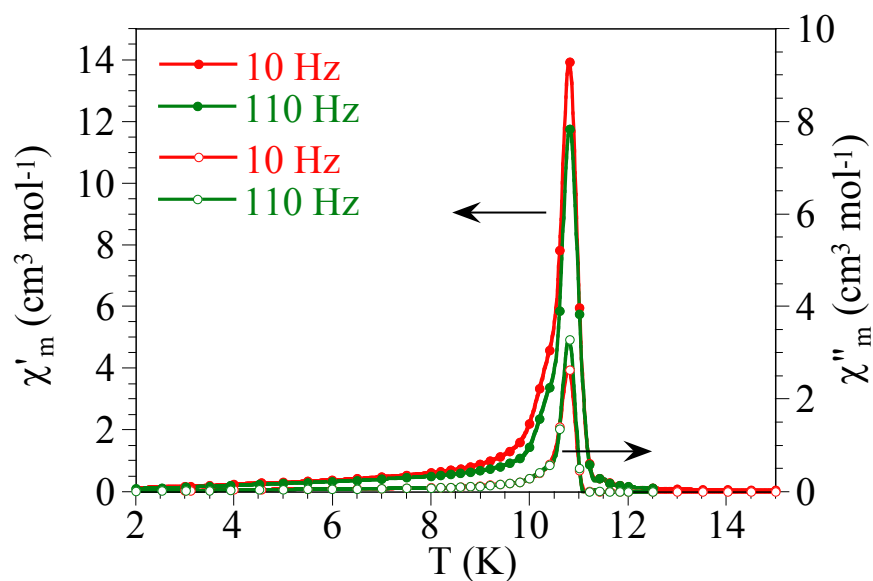

**Figure S24.** Thermal variation of the in phase ( $\chi'$ , filled circles, left scale) and out of phase ( $\chi''$ , empty circles, right scale) AC susceptibility at different frequencies for compound  $(\text{NBu}_4)[\text{MnCr}(\text{C}_6\text{O}_4\text{Br}_2)_3] \cdot 2\text{C}_6\text{H}_5\text{NO}_2$  (**6**)

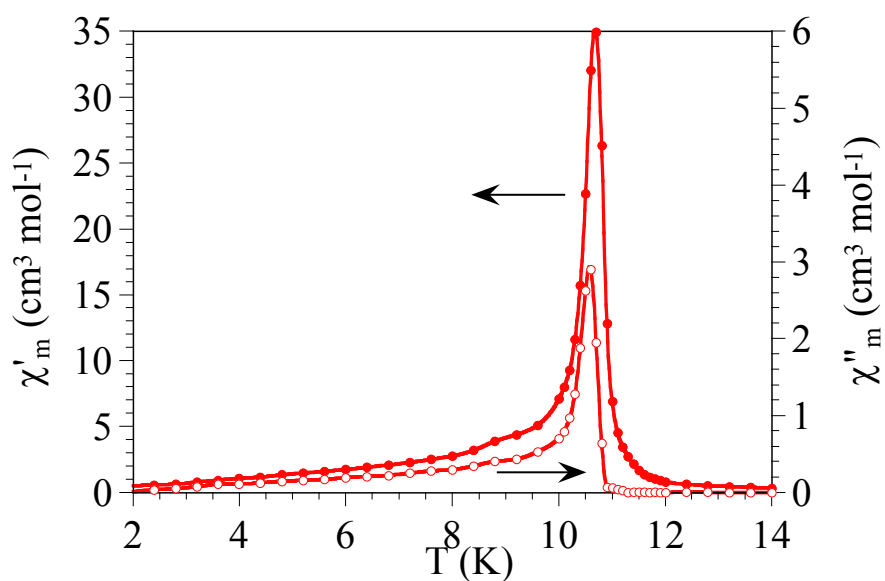

**Figure S25.** Thermal variation of the in phase ( $\chi'$ , filled circles, left scale) and out of phase ( $\chi''$ , empty circles, right scale) AC susceptibility at 110 Hz for compound **PhCl@5**.

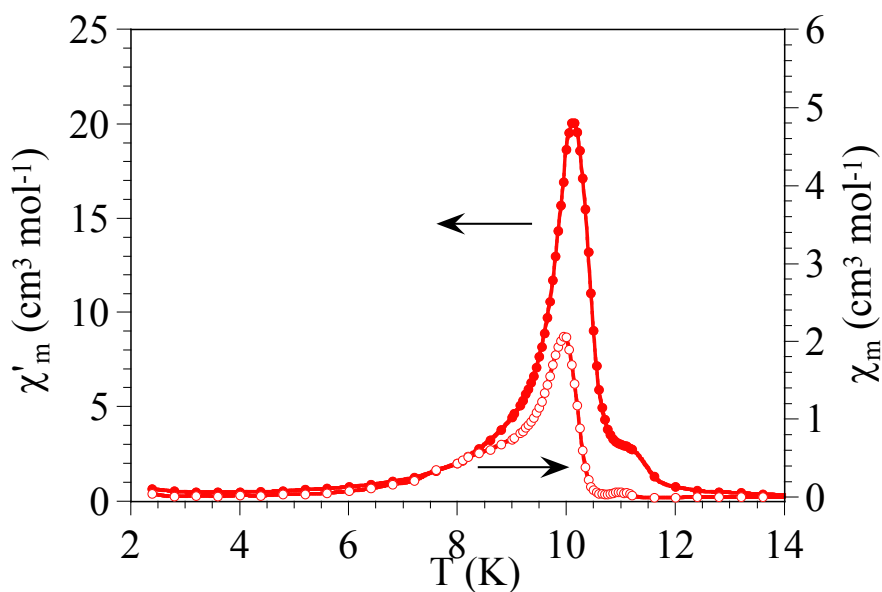

**Figure S26.** Thermal variation of the in phase ( $\chi'$ , filled circles, left scale) and out of phase ( $\chi''$ , empty circles, right scale) AC susceptibility at 110 Hz for compound **PhCl@5** after heating at 400 K (7).

## References

1. Atzori, M.; Benmansour, S.; Mínguez Espallargas, G.; Clemente-León, M.; Abhervé, A.; Gómez-Claramunt, P.; Coronado, E.; Artizzu, F.; Sessini, E.; Deplano, P.; Serpe, A.; Mercuri, M. L.; Gómez García, C. J. A Family of Layered Chiral Porous Magnets Exhibiting Tunable Ordering Temperatures. *Inorg. Chem.* **2013**, *52*, 10031-10040.
2. Abhervé, A.; Clemente-León, M.; Coronado, E.; Gómez-García, C. J.; Verneret, M. One-Dimensional and Two-Dimensional Anilate-Based Magnets with Inserted Spin-Crossover Complexes. *Inorg. Chem.* **2014**, *53*, 12014-12026.
3. Abhervé, A.; Mañas-Valero, S.; Clemente-León, M.; Coronado, E. Graphene related magnetic materials: micromechanical exfoliation of 2D layered magnets based on bimetallic anilate complexes with inserted  $[\text{Fe}^{\text{III}}(\text{acac}_2\text{-trien})]^+$  and  $[\text{Fe}^{\text{III}}(\text{sal}_2\text{-trien})]^+$  molecules. *Chem. Sci.* **2015**, *6*, 4665-4673.
4. Palacios-Corella, M.; Fernández-Espejo, A.; Bazaga-García, M.; Losilla, E. R.; Cabeza, A.; Clemente-León, M.; Coronado, E. Influence of Proton Conducting Cations on the Structure and Properties of 2D Anilate-Based Magnets. *Inorg. Chem.* **2017**, *56*, 13865-13877.
